# Supplementary material
Source: HighWire-hosted journal article supplement (http://www.jneurosci.org/highwire/filestream/600873/field_highwire_adjunct_files/0/Supplemental_Figures.pdf)
Supplement: Supplemental_Figures.pdf [file Supplemental_Figures.pdf]

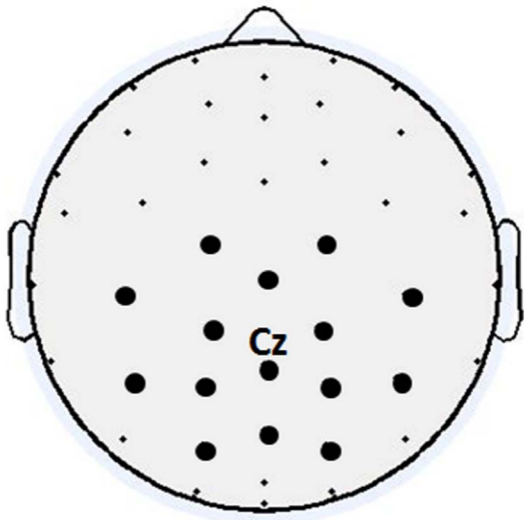

N400c amplitude ( $\mu\text{V}$ )

control

PPA

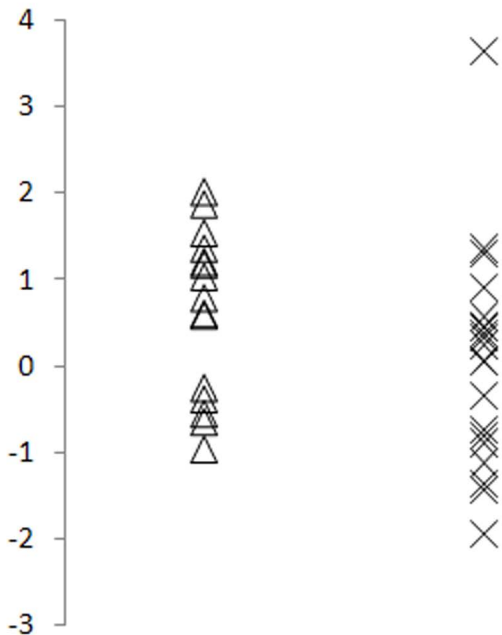

**Supplementary Figure 1.** Electrode locations used in inferential analyses. A bilateral central/posterior cluster of electrode locations was used in analyses of N400 effects.

**Supplementary Figure 2.** N400c amplitudes (unrelated – related amplitudes from 350-550ms at C4) for individual patients and controls.
